# Supplementary material for: Inhibition of DDR1‐BCR signalling by nilotinib as a new therapeutic strategy for metastatic colorectal cancer
Source: PubMed Central journal article supplement (PMC5887546; doi:10.15252/emmm.201707918), 2018-02-09
Supplement: EMMM-10-e7918-s001.pdf [file EMMM-10-e7918-s001.pdf]

# Appendix

## Inhibition of DDR1-BCR signalling by nilotinib as a new therapeutic strategy for metastatic colorectal cancer

### Table of Contents:

|                                                                                                                                     |    |
|-------------------------------------------------------------------------------------------------------------------------------------|----|
| <b>Appendix Table S1.</b> Univariate and multivariate analysis.                                                                     | p2 |
| <b>Appendix Table S2.</b> Statistical analysis information for main figures.                                                        | p3 |
| <b>Appendix Tables S3.</b> Statistical analysis information for EV figures.                                                         | p4 |
| <b>Appendix Figure S1.</b> Luciferase signal as a surrogate marker of liver tumour burden from Figure 3F.                           | p5 |
| <b>Appendix Figure S2.</b> No significant difference in the expression level of DDR1 between the four CMS subtypes.                 | p6 |
| <b>Appendix Figure S3.</b> DDR1 expression (A, B) and nilotinib treatment (C) poorly affect CRC cell growth in standard conditions. | p7 |

**Appendix Table S1.** Univariate and multivariate analysis.

| <i>Univariate analyse</i>         |           | PFS  |               |              | OS   |               |              |
|-----------------------------------|-----------|------|---------------|--------------|------|---------------|--------------|
|                                   | N=143(%)  | HR   | 95%CI         | p*           | HR   | 95%CI         | p*           |
| <b>DDR1 (210749_x_1)</b>          |           |      |               | <b>0.006</b> |      |               | <b>0.062</b> |
| < 10.6                            | 72(50.3)  | 1    |               |              | 1    |               |              |
| ≥ 10.6                            | 71(49.7)  | 1.62 | [1.15 ; 2.30] |              | 1.44 | [0.98 ; 2.10] |              |
| <b>WHO performance status</b>     |           |      |               | <b>0.022</b> |      |               | 0.262        |
| 0                                 | 60(43.8)  | 1    |               |              | 1    |               |              |
| ≥1                                | 77(56.2)  | 1.52 | [1.06 ; 2.19] |              | 1.25 | [0.84 ; 1.85] |              |
| Missing                           | 6         |      |               |              |      |               |              |
| <b>Tumor location</b>             |           |      |               | 0.329        |      |               | <b>0.010</b> |
| Right                             | 35(24.7)  | 1    |               |              | 1    |               |              |
| Left                              | 104(73.2) | 0.83 | [0.56 ; 1.23] |              | 0.65 | [0.42 ; 1.01] |              |
| Transverse                        | 3(2.1)    | 1.88 | [0.57 ; 6.22] |              | 4.81 | [1.38 ; 16.7] |              |
| Missing                           | 1         |      |               |              |      |               |              |
| <b>Grade</b>                      |           |      |               | <b>0.077</b> |      |               | <b>0.006</b> |
| Well/moderately diff              | 122(91.0) | 1    |               |              | 1    |               |              |
| Poorly diff / undifferentiated    | 12(9.0)   | 1.79 | [0.98 ; 3.27] |              | 2.61 | [1.42 ; 4.82] |              |
| Missing                           | 9         |      |               |              |      |               |              |
| <b>Metastase</b>                  |           |      |               | 0.775        |      |               | 0.421        |
| Synchronous                       | 121(84.6) | 1    |               |              | 1    |               |              |
| Métachronous                      | 22(15.4)  | 1.07 | [0.67 ; 1.73] |              | 0.80 | [0.46 ; 1.39] |              |
| <b>Number of metastatic sites</b> |           |      |               | <b>0.003</b> |      |               | <b>0.034</b> |
| 1                                 | 82 (57.3) | 1    |               |              | 1    |               |              |
| >1                                | 61 (42.7) | 1.71 | [1.21 ; 2.43] |              | 1.51 | [1.03 ; 2.10] |              |
| <b>Status</b>                     |           |      |               | 0.670        |      |               | <b>0.027</b> |
| MSI                               | 4(10.5)   | 1    |               |              | 1    |               |              |
| MSS                               | 34(89.5)  | 0.79 | [0.27 ; 2.27] |              | 0.23 | [0.08 ; 0.63] |              |
| Missing                           | 105       |      |               |              |      |               |              |
| <b>BRAF</b>                       |           |      |               | 0.668        |      |               | 0.458        |
| WT                                | 30(93.8)  | 1    |               |              | 1    |               |              |
| Mutated                           | 2(6.2)    | 1.39 | [0.33 ; 5.97] |              | 0.49 | [0.06 ; 3.82] |              |
| Missing                           | 111       |      |               |              |      |               |              |
| <b>KRAS</b>                       |           |      |               | 0.336        |      |               | 0.240        |
| WT                                | 18(54.5)  | 1    |               |              | 1    |               |              |
| Mutated                           | 15(45.5)  | 1.43 | [0.69 ; 2.94] |              | 1.62 | [0.73 ; 3.59] |              |
| Missing                           | 110       |      |               |              |      |               |              |
| <b>CMS</b>                        |           |      |               | <b>0.201</b> |      |               | <b>0.030</b> |
| CMS1                              | 15(14.4)  | 1    |               |              | 1    |               |              |
| CMS2                              | 29(27.9)  | 0.84 | [0.44 ; 1.61] |              | 0.38 | [0.19 ; 0.77] |              |
| CMS3                              | 24(23.1)  | 0.68 | [0.34 ; 1.36] |              | 0.33 | [0.16 ; 0.70] |              |
| CMS4                              | 36(34.6)  | 0.54 | [0.29 ; 1.02] |              | 0.36 | [0.18 ; 0.70] |              |
| Missing                           | 39        |      |               |              |      |               |              |
| <i>Multivariate analyse</i>       |           | PFS  |               |              | OS   |               |              |
|                                   |           | HR   | 95%CI         | p*           | HR   | 95%CI         | p*           |
| <b>DDR1 (210749_x_1)</b>          |           |      |               | <b>0.003</b> |      |               |              |
| < 10.6                            |           | 1    |               |              |      |               |              |
| ≥ 10.6                            |           | 1.76 | [1.21 ; 2.55] |              |      |               |              |
| <b>Tumor location</b>             |           |      |               |              |      |               | <b>0.00</b>  |
| Right                             |           |      |               |              | 1    |               |              |
| Left                              |           |      |               |              | 0.54 | [0.30 ; 0.97] |              |
| Transverse                        |           |      |               |              | 8.31 | [2.14 ; 32.3] |              |
| <b>Grade</b>                      |           |      |               |              |      |               | <b>0.00</b>  |
| Well/moderately diff              |           |      |               |              | 1    |               |              |
| Poorly diff / undifferentiated    |           |      |               |              | 4.28 | [2.07 ; 8.85] |              |
| <b>Number of metastatic sites</b> |           |      |               | <b>0.010</b> |      |               |              |
| 1                                 |           | 1    |               |              |      |               |              |
| >1                                |           | 1.64 | [1.13 ; 2.37] |              |      |               |              |
| <b>CMS</b>                        |           |      |               |              |      |               | <b>0.00</b>  |
| CMS1                              |           |      |               |              | 1    |               |              |
| CMS2                              |           |      |               |              | 0.28 | [0.12 ; 0.62] |              |
| CMS3                              |           |      |               |              | 0.27 | [0.11 ; 0.63] |              |
| CMS4                              |           |      |               |              | 0.21 | [0.10 ; 0.46] |              |

**Appendix Table S2.** Statistical analysis information for main figures.

| Figure                              | Panel                  | Experiment                                  | n-value | p-value | Significativity |
|-------------------------------------|------------------------|---------------------------------------------|---------|---------|-----------------|
| 1                                   | B                      | nilotinib vs DMSO                           | 17      | 0,0269  | *               |
|                                     | D                      | nilotinib vs DMSO                           | 11      | 0,0447  | *               |
| 2                                   | B                      | HCT116 shRNA DDR1.1 vs shRNA Ctrl           | 4       | 0,0022  | **              |
|                                     |                        | HCT116 shRNA DDR1.2 vs shRNA Ctrl           | 4       | 0,0001  | ***             |
|                                     |                        | HT29 shRNA DDR1.1 vs shRNA Ctrl             | 4       | 0,0008  | ***             |
|                                     |                        | HT29 shRNA DDR1.2 vs shRNA Ctrl             | 4       | 0,0005  | ***             |
| 2                                   | C                      | HCT116 shRNA DDR1.1 vs shRNA Ctrl           | 7       | <0,0001 | ***             |
|                                     |                        | HCT116 shRNA DDR1.2 vs shRNA Ctrl           | 7       | 0,0001  | ***             |
| 2                                   | D                      | shRNA DDR1 vs shRNA Ctrl (metastatic index) | 12      | 0,0082  | **              |
| 2                                   |                        | shRNA DDR1 vs shRNA Ctrl (ctDNA)            | 12      | 0,0461  | *               |
| 2                                   | F                      | SW620 DDR1 vs mock                          | 3       | 0,0325  | *               |
|                                     |                        | HT29 DDR1 vs mock                           | 3       | 0,05    | *               |
| 2                                   | G                      | DDR1 vs mock (metastatic index)             | 20 ; 12 | 0,0356  | *               |
|                                     |                        | DDR1 vs mock (ctDNA)                        | 20 ; 12 | 0,0432  | *               |
| 3                                   | C                      | shCtrl nilotinib vs DMSO                    | 4       | 0,0025  | **              |
|                                     |                        | shDDR1 + WT nilotinib vs DMSO               | 4       | 0,0076  | **              |
| 3                                   | D                      | shDDR1+DDR1T701I vs shDDR1+DDR1 WT          | 5       | 0,0178  | *               |
| 3                                   | E                      | SW620 mock DMSO vs SW620 DDR1 DMSO          | 3       | 0,0325  | *               |
|                                     |                        | SW620 DDR1 nilotinib vs SW620 DDR1 DMSO     | 3       | 0,0087  | **              |
| 3                                   | F                      | nilotinib vs DMSO (metastatic index)        | 14 ; 21 | 0,0425  | *               |
|                                     |                        | nilotinib vs DMSO (ctDNA)                   | 14 ; 21 | 0,0016  | **              |
| 5                                   | F                      | shRNA BCR vs shRNA Ctrl (invasion)          | 3       | 0,0076  | **              |
|                                     |                        | shRNA BCR vs shRNA Ctrl (3D migration)      | 7       | 0,0008  | ***             |
| 5                                   | H                      | HCT116 shBCR+BCR WT vs shBCR                | 4       | 0,0389  | *               |
|                                     |                        | HCT116 shBCR vs shCtrl                      | 4       | 0,0028  | **              |
|                                     |                        | SW620 DDR1 shBCR+BCR WT vs shBCR            | 4       | 0,0472  | *               |
|                                     |                        | SW620 DDR1 shBCR vs shCtrl                  | 4       | 0,0272  | *               |
| 6                                   | A                      | b-catenin vs mock                           | 6       | 0,0022  | **              |
|                                     |                        | DDR1 vs mock                                | 6       | 0,0022  | **              |
|                                     | B                      | b-catenin vs mock                           | 6       | 0,016   | *               |
|                                     |                        | DDR1 vs mock                                | 6       | 0,0022  | **              |
|                                     | C                      | DDR1 vs mock (Fra1 mRNA)                    | 6       | 0,0385  | *               |
|                                     |                        | DDR1+nilotinib vs DDR1 (Fra1 mRNA)          | 6       | 0,04    | *               |
|                                     |                        | DDR1 KD vs DDR1 (Fra1 mRNA)                 | 6       | 0,1447  | ns              |
|                                     |                        | DDR1 vs mock (Myc mRNA)                     | 6       | 0,0244  | *               |
|                                     |                        | DDR1+nilotinib vs DDR1 (Myc mRNA)           | 6       | 0,0053  | **              |
|                                     |                        | DDR1 KD vs DDR1 (Myc mRNA)                  | 6       | 0,4559  | ns              |
|                                     |                        | DDR1 vs mock (Jun mRNA)                     | 6       | 0,0005  | ***             |
|                                     |                        | DDR1+nilotinib vs DDR1 (Jun mRNA)           | 6       | 0,0002  | ***             |
|                                     | D                      | shRNA DDR1 vs shRNA Ctrl (Fra1 mRNA)        | 6       | 0,0043  | **              |
|                                     |                        | shRNA DDR1 vs shRNA Ctrl (Myc mRNA)         | 6       | 0,005   | **              |
| shRNA DDR1 vs shRNA Ctrl (Jun mRNA) |                        | 6                                           | 0,043   | *       |                 |
| E                                   | BCR WT -COL vs +COL    | 3                                           | 0,03    | *       |                 |
|                                     | BCR WT +COL vs +Nilo   | 3                                           | 0,0005  | ***     |                 |
|                                     | BCR WT +COL vs +Wnt3a  | 3                                           | 0,5272  | ns      |                 |
|                                     | BCR Y177F -COL vs +COL | 3                                           | 0,0221  | *       |                 |
| 6                                   | F                      | nilotinib vs DMSO                           | 20      | <0,0001 | ***             |
| 6                                   | G                      | SW620 DDR1 DMSO vs SW620 mock DMSO          | 3       | 0,0346  | *               |
|                                     |                        | SW620 DDR1 IWR-1-endo vs DMSO               | 3       | 0,0347  | *               |
| 7                                   | B                      | Metastatic nodules vs primary tumours       | 18      | 0,0314  | *               |
|                                     |                        | CPP19 nilotinib 300nM vs Ctrl               | 3       | 0,0383  | *               |
|                                     | D                      | CPP30 nilotinib 100nM vs Ctrl               | 3       | 0,0297  | *               |
|                                     |                        | CPP30 nilotinib 300nM vs Ctrl               | 3       | 0,0157  | *               |
|                                     | G                      | CPP19 siRNA DDR1 vs Ctrl                    | 6       | 0,0028  | **              |
|                                     |                        | CPP30 siRNA DDR1 vs Ctrl                    | 6       | 0,0028  | **              |
|                                     |                        | CTC44 nilotinib 100nM vs Ctrl               | 4       | 0,0319  | *               |
|                                     |                        | CTC44 nilotinib 300nM vs Ctrl               | 4       | 0,0097  | **              |
|                                     | H                      | CTC45 nilotinib 300nM vs Ctrl               | 4       | 0,0097  | **              |
|                                     |                        | siRNA DDR1 vs Ctrl                          | 4       | 0,002   | **              |
| 7                                   | I                      | nilotinib vs DMSO                           | 10      | 0,0089  | **              |

**Appendix Table S3.** Statistical analysis information for EV figures.

| Figure | Panel        | Experiment             | n-value | p-value | Significativity |
|--------|--------------|------------------------|---------|---------|-----------------|
| EV4    | A            | mRNA CD44              | 3       | <0,0001 | ***             |
|        |              | mRNA CCND1             | 3       | 0,0132  | *               |
|        |              | mRNA LGR5              | 6       | 0,0002  | ***             |
|        |              | mRNA AXIN2             | 4       | 0,0193  | *               |
|        |              | mRNA ASCL2             | 8       | 0,4228  | ns              |
|        |              | mRNA SLC12A2           | 8       | 0,7759  | ns              |
|        | B            | mock-COL vs mock+COL   | 3       | 0,0221  | *               |
|        |              | DDR1-COL vs DDR1+COL   | 3       | 0,0013  | **              |
|        |              | mock-COL vs DDR1-COL   | 3       | 0,0001  | ***             |
|        |              | mock+COL vs DDR1+COL   | 3       | <0,0001 | ***             |
| C      | mock vs DDR1 | 9                      | 0,0013  | **      |                 |
| EV5    | B            | HCT116 shBCR vs shCtrl | 4       | 0,0211  | *               |
|        |              | SW620 shBCR vs shCtrl  | 4       | 0,0211  | *               |

## Appendix Figures

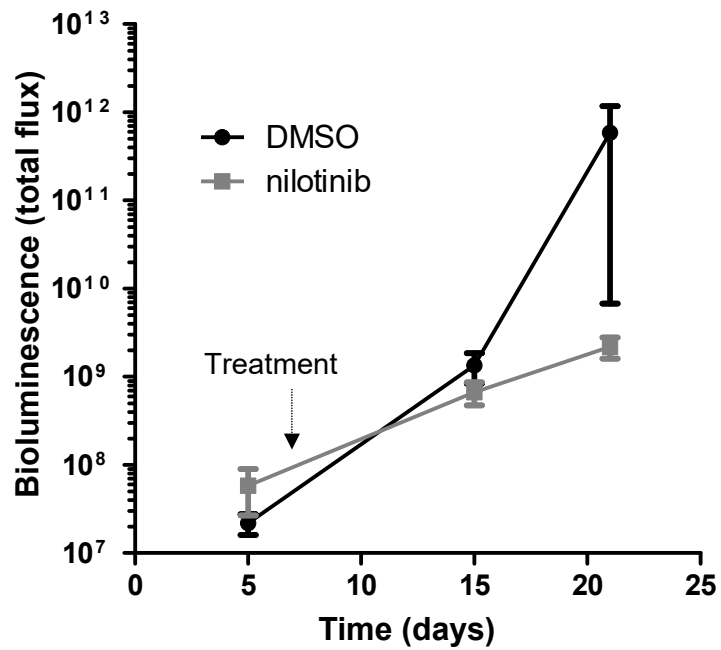

**Appendix Figure S1.** Luciferase signal as a surrogate marker of liver tumour burden from Figure 3F.

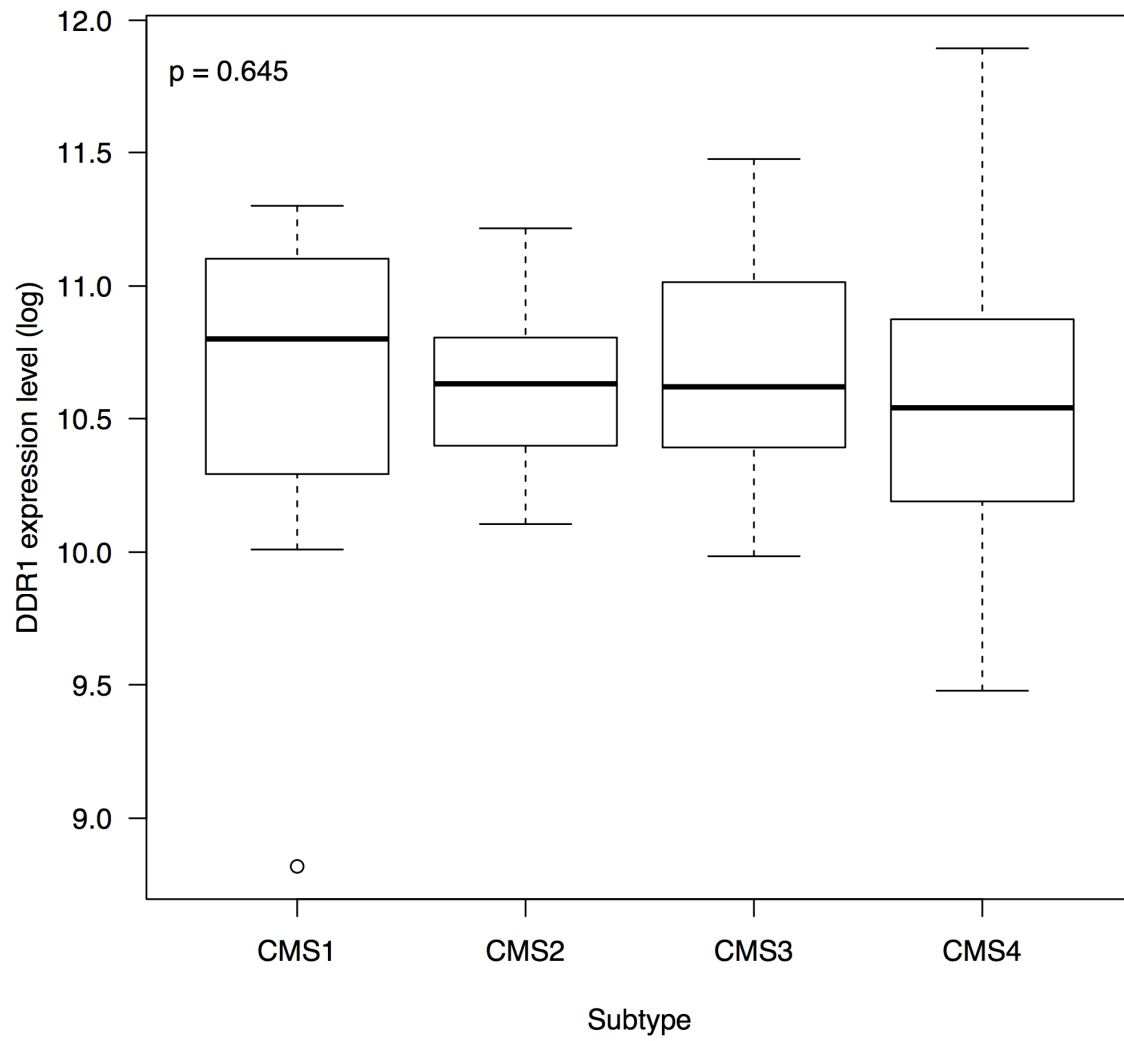

**Appendix Figure S2.** No significant difference in the expression of DDR1 between the four CMS subtypes.

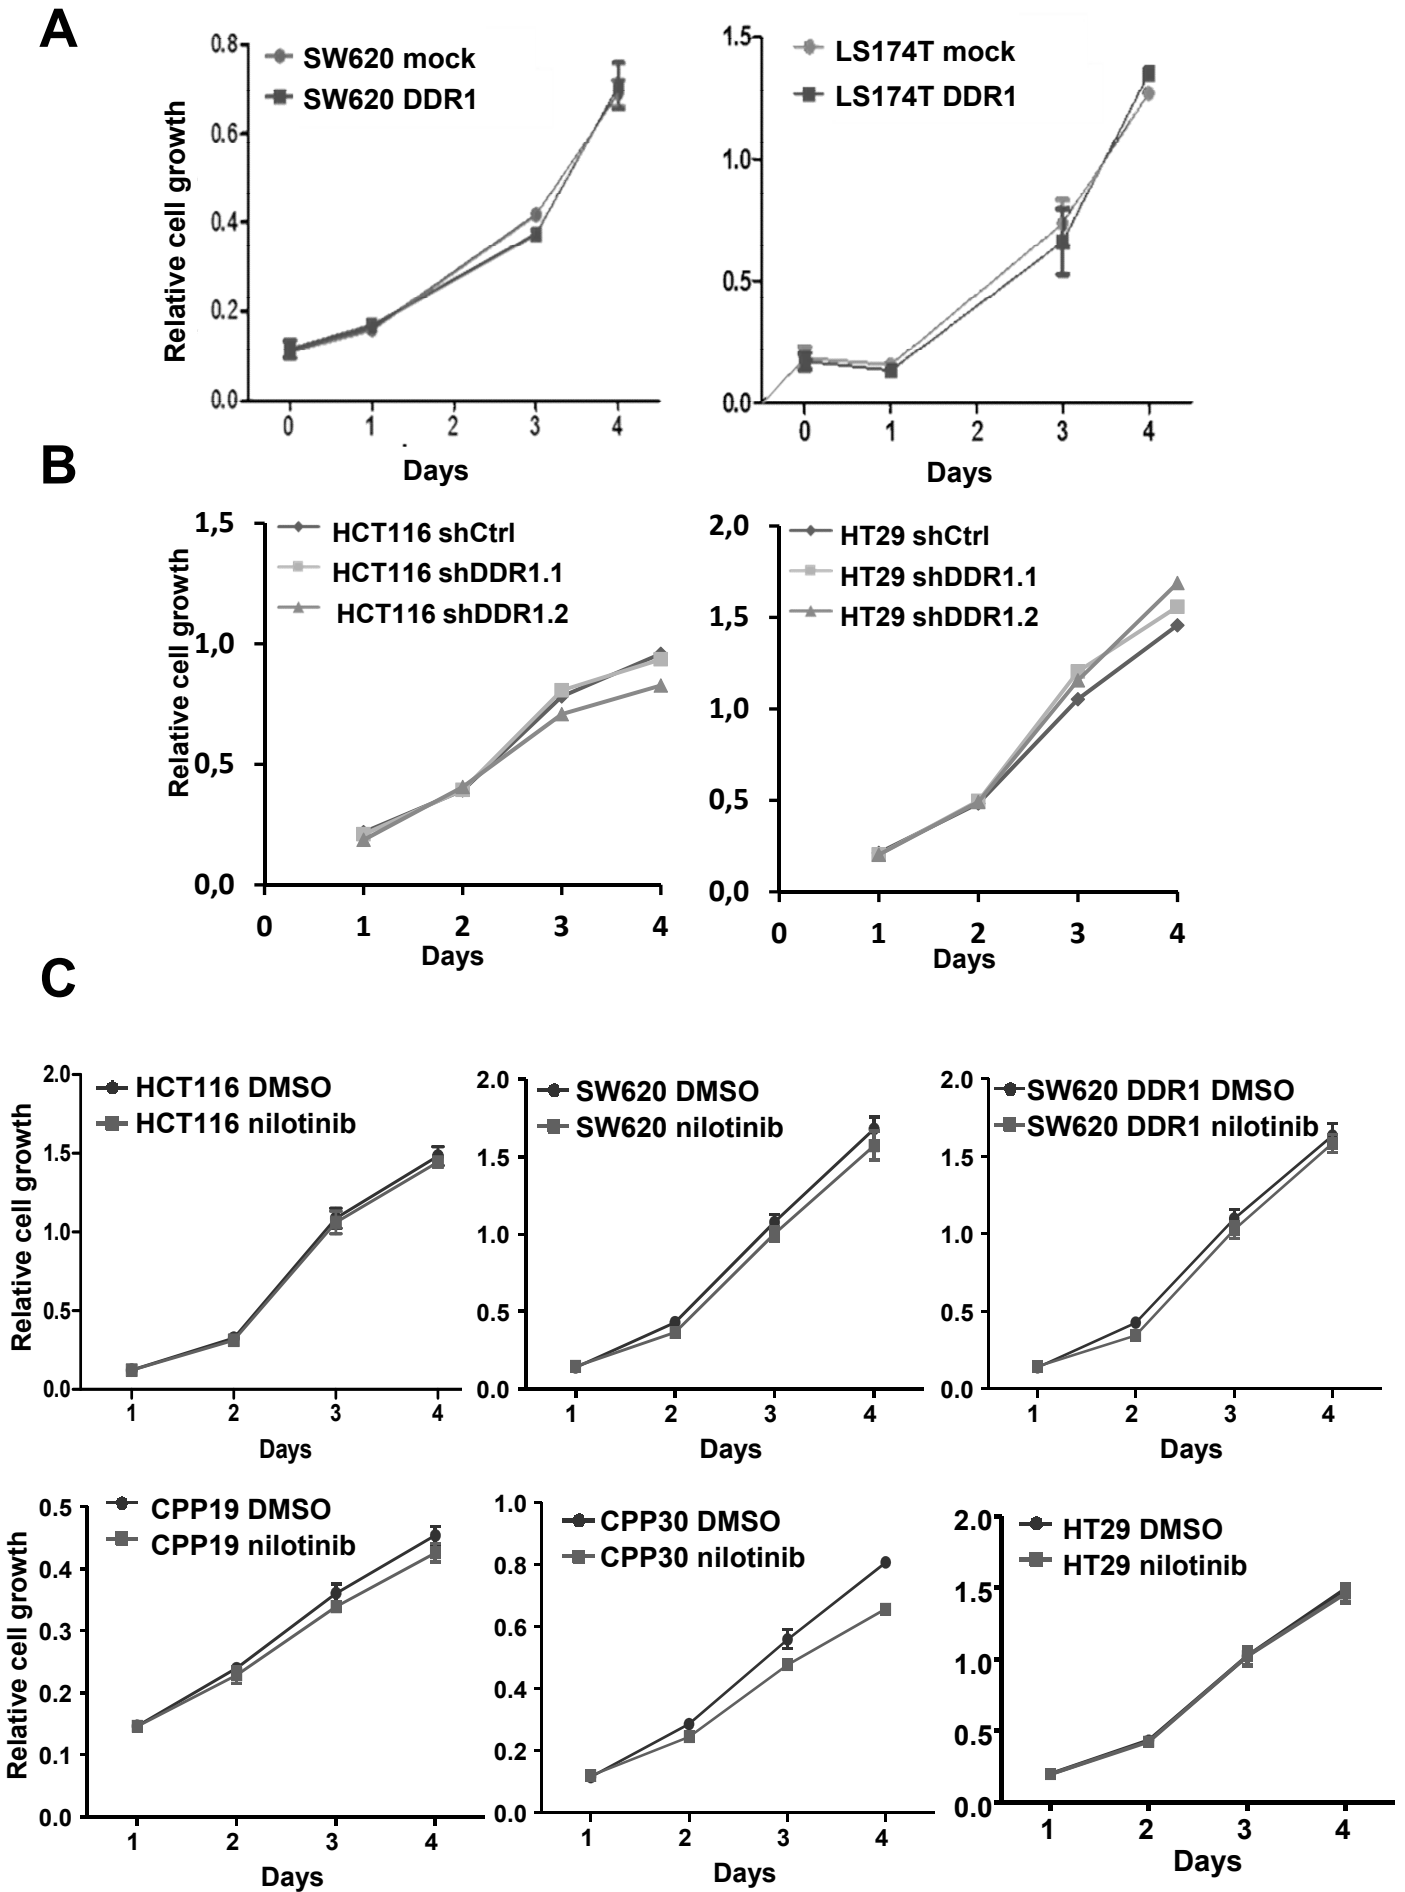

**Appendix Figure S3.** DDR1 expression (A,B) and nilotinib treatment (C) poorly affect CRC cell growth in standard conditions.
