# Supplementary material for: Inhibition of DDR1‐BCR signalling by nilotinib as a new therapeutic strategy for metastatic colorectal cancer
Source: PubMed Central journal article supplement (PMC5887546; doi:10.15252/emmm.201707918), 2018-02-09

Figure 5

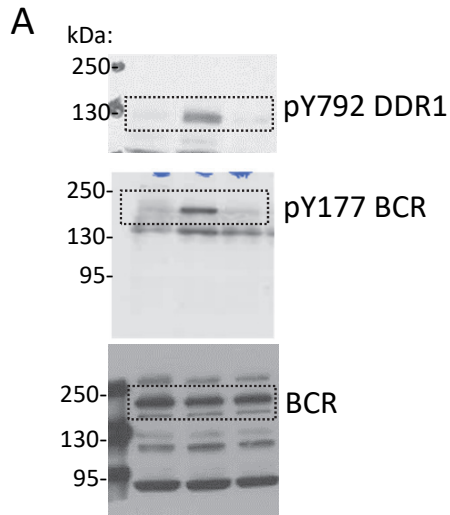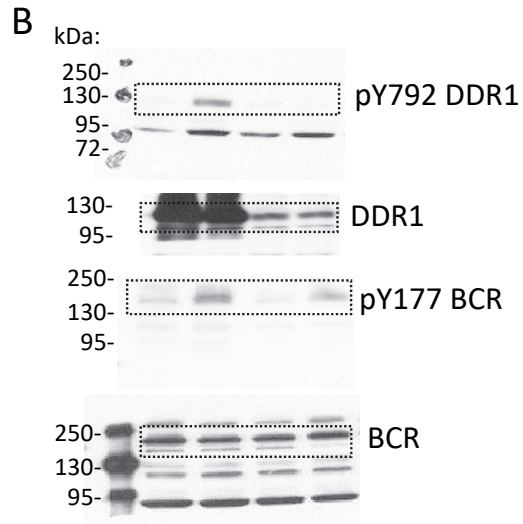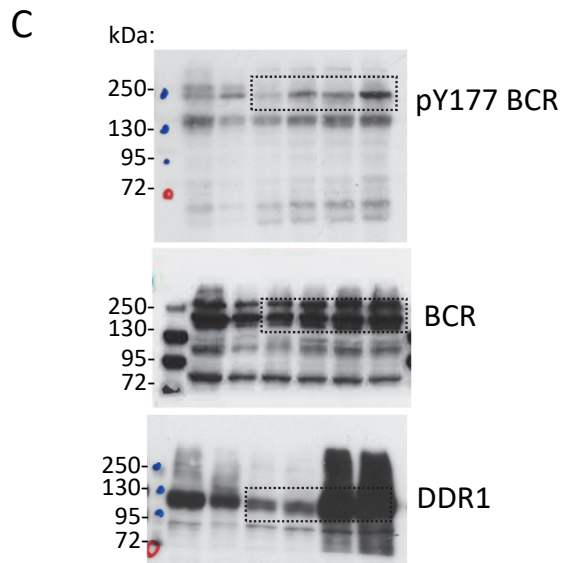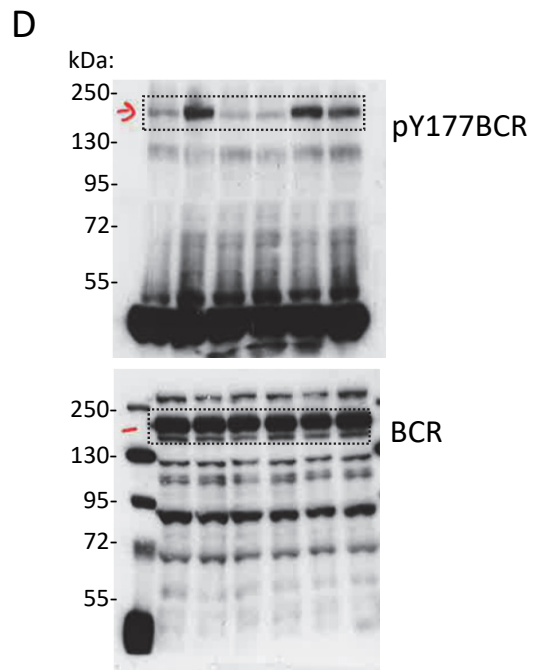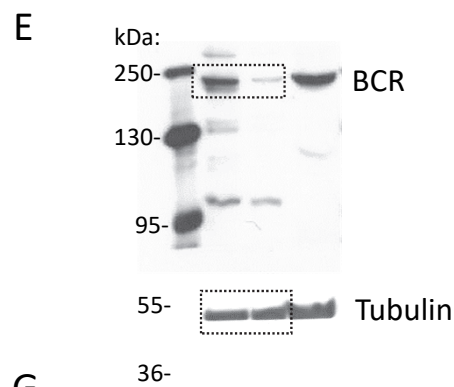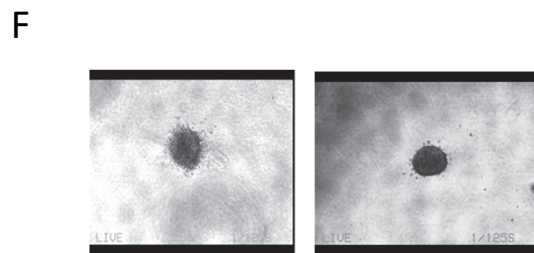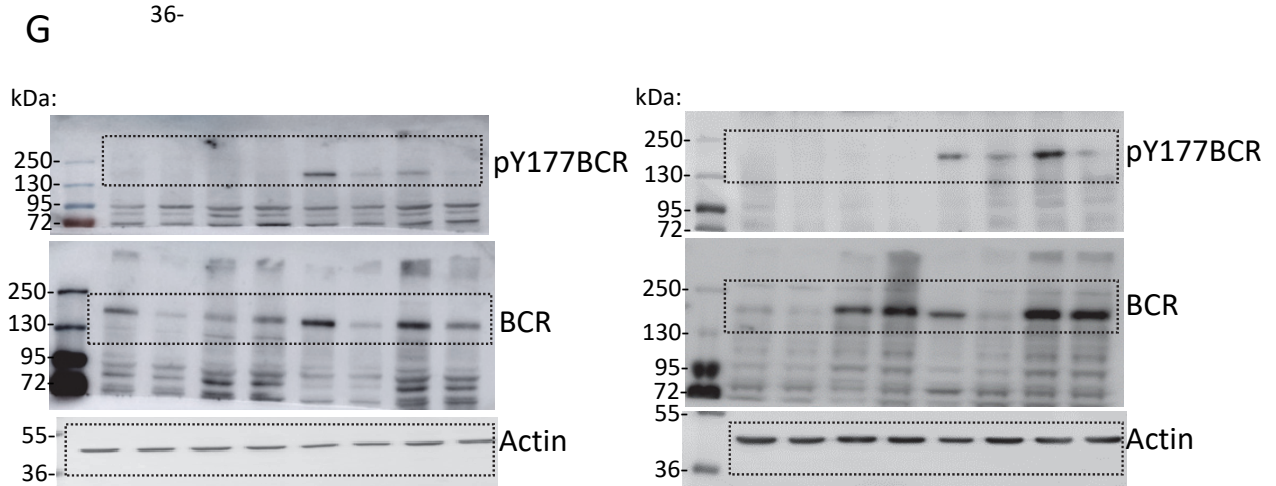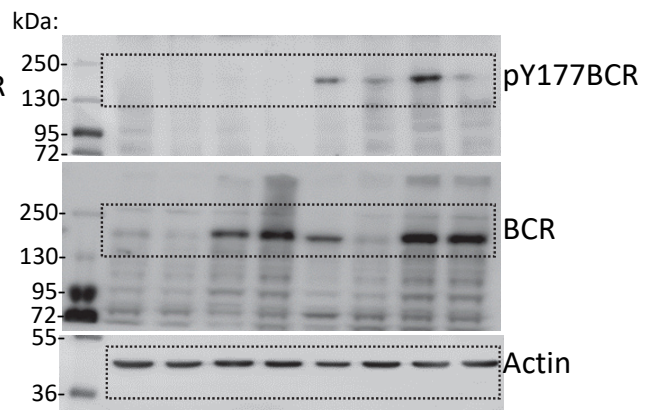

Supplement: EMMM-10-e7918-s009.pdf [file EMMM-10-e7918-s009.pdf]
